# Supplementary material for: Kawasaki disease and 13-valent pneumococcal conjugate vaccination among young children: A self-controlled risk interval and cohort study with null results
Source: PLoS Med. 2019 Jul 2;16(7):e1002844. doi: 10.1371/journal.pmed.1002844 (PMC6605647; doi:10.1371/journal.pmed.1002844)
Supplement: S4 Data — KD, Kawasaki disease; SCRI, self-controlled risk interval. (XLS) [file pmed.1002844.s006.xls]

## Sheet: pcv13scrialtlog_lev1_2
obs	RW28DInd	offdose
1	0	-0.19578
2	0	-0.19453
3	0	-0.18956
4	1	-0.18833
5	1	-0.18711
6	0	-0.18589
7	1	-0.18589
8	0	-0.18589
9	0	-0.18589
10	1	-0.18589
11	1	-0.18346
12	1	-0.18346
13	0	-0.18346
14	1	-0.18346
15	0	-0.18225
16	1	-0.18225
17	1	-0.18225
18	0	-0.17629
19	0	-0.17629
20	1	-0.17393
21	0	-0.17276
22	0	-0.16468
23	1	-0.16241
24	0	-0.16128
25	1	-0.15241
26	1	-0.13754
27	0	-0.12643
28	1	-0.12349
29	0	-0.12155
30	0	-0.11962
31	1	-0.11962
32	1	-0.11962
33	1	-0.11866
34	1	-0.11771
35	0	-0.11771
36	1	-0.11676
37	0	-0.11676
38	1	-0.11676
39	0	-0.11582
40	1	-0.11582
41	0	-0.11487
42	0	-0.11487
43	1	-0.11487
44	1	-0.11487
45	1	-0.11487
46	0	-0.11394
47	1	-0.10931
48	0	-0.10568
49	0	-0.103
50	1	-0.10123
51	1	-0.09346
52	0	-0.09094
53	1	-0.09011
54	1	-0.086
55	1	-0.07729
56	1	-0.06976
57	0	-0.06829
58	0	-0.06829
59	1	-0.06829
60	0	-0.06684
61	0	-0.06684
62	1	-0.06684
63	0	-0.06612
64	0	-0.06541
65	0	-0.06469
66	0	-0.06398
67	1	-0.06328
68	0	-0.06258
69	0	-0.06118
70	0	-0.0598
71	0	-0.0598
72	0	-0.05912
73	0	-0.05776
74	0	-0.04863
75	0	-0.04553
76	0	-0.04251
77	0	-0.03957
78	1	-0.03842
79	0	-0.03615
80	1	-0.03559
81	0	-0.03393
82	1	-0.03339
83	0	-0.02758
84	1	-0.01359
85	0	-0.00756
86	0	0.01318
87	1	0.0138
88	1	0.0138
89	1	0.014
90	0	0.014
91	0	0.0142
92	0	0.0144
93	1	0.01459
94	0	0.01498
95	1	0.01498
96	0	0.01517
97	0	0.01554
98	1	0.01572
99	0	0.02111
100	1	0.02433
101	0	0.02457
102	1	0.02457
103	0	0.02467
104	1	0.0247
105	0	0.02479
106	0	0.02501
107	1	0.02502
108	0	0.02502
109	0	0.02422
110	1	0.02206
111	1	0.02098
